# Supplementary material for: The Role of Exposure History on HIV Acquisition: Insights from Repeated Low-dose Challenge Studies
Source: PLOS journal article supplement (doi:10.1371/journal.pcbi.1002767), 2012-11-08
Supplement: S2 (10.1371/journal.pcbi.1002767.s002) [file journal.pcbi.1002767.s002]

301 Moved Permanently

# Moved Permanently

The document has moved here.

---

Apache Server at www.ploscompbiol.org Port 80
